# Supplementary material
Source: PubMed Central journal article supplement (PMC2797166)

4°C 70min

Antp

Ctl

5 $\mu$ M

10 $\mu$ M

CHO-K1

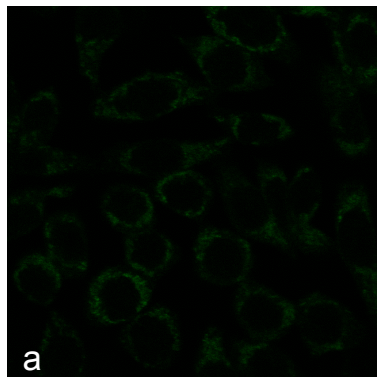

a

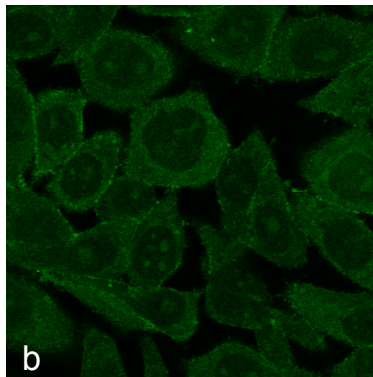

b

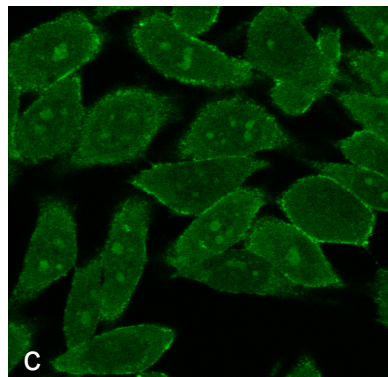

c

CHO-pgs A745

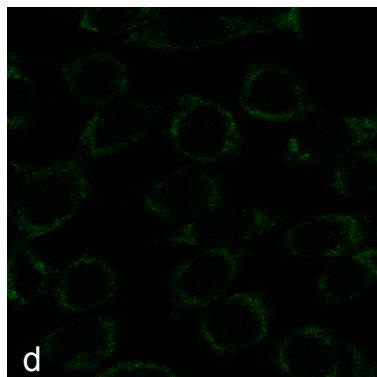

d

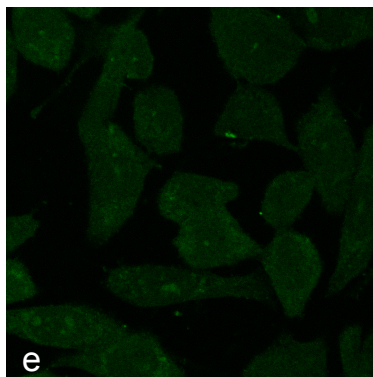

e

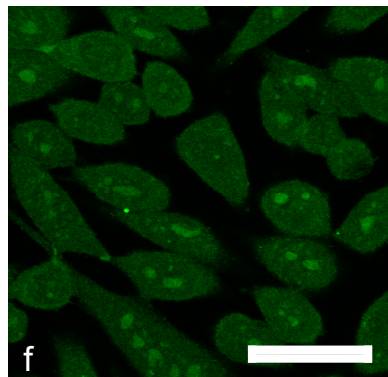

f

Supplement: supp_M109.056309_jbc.M109.056309-1.pdf [file supp_M109.056309_jbc.M109.056309-1.pdf]
